# Supplementary material
Source: Elsevier journal article supplement (https://www.sciencedirect.com/science/article/pii/S0211699521002204)
Supplement: mmc1 [file S0211699521002204:mmc1.pdf]

## **PROTOCOLO DE LA PRUEBA DE EQUILIBRIO PERITONEAL**

1. Anamnesis breve para comprobar que el paciente se encuentra estable. Pesado y toma de TA antes de iniciar la PEP. Analítica de sangre. BM test en diabéticos.
2. La prueba se realiza con una bolsa al 3,86/4,25%. El volumen utilizado es de 2 litros, excepto en pacientes que usen volúmenes medios más bajos, en los que se usa el más habitual (1,5 litros o, excepcionalmente, 1 litro)
3. Se necesitan seis muestras de efluente, rotuladas del siguiente modo: L-1, L 0, L 60, L 120, L 240 y L residual post.
4. Se comprueba que el paciente se haya puesto en domicilio el cambio previo al 2,27/2,5%, y que no haya realizado ningún cambio desde entonces.
5. Se comienza el intercambio al 3,86%, de acuerdo a los siguientes pasos:
  - a. Si la prueba es con 2 litros, se pesa la bolsa a infundir antes de conectar al paciente y se anota el peso en la hoja de protocolo
  - b. Se procede al drenado del intercambio nocturno, que el paciente trae de casa. Es esencial permitir un drenado completo de ese intercambio. Si el drenaje es inferior al 80% del volumen infundido (<1600 cc para bolsas de 2 litros), se valora de manera individualizada la conveniencia de suspender la PEP. Al finalizar el drenaje de la bolsa nocturna, se pesa ésta (anotando en el volante y en la hoja de PEP) y se recoge la muestra L-1 (5cc).
  - c. Si el volumen de la PEP es de 1 o 1,5 litros, se permite la transferencia del líquido sobrante de la bolsa de infusión hacia la bolsa de drenaje del cambio nocturno, hasta que el peso de la bolsa de infusión sea el deseado (1 o 1,5 Kg). Luego, se anota el peso correspondiente en la hoja de PEP. La transferencia a la bolsa de drenaje se hará después de pesar la bolsa de drenaje del cambio nocturno y de recoger la muestra L-1.
  - d. Se procede a infundir el líquido de diálisis de la PEP. Si ésta se hace con 2 litros, se ignora el paso c) y se procede directamente a la infusión de líquido.
6. Tras la infusión inicial del líquido de diálisis de la PEP, se procede, de manera inmediata, a drenar ~200 cc y se recoge la muestra L0 (5cc). A continuación, se reinfunde nuevamente el líquido extraído y se cierra el sistema.
7. A los 60 minutos se procede a drenar completamente el peritoneo. Se pesa la bolsa de drenaje y se anota en la hoja de protocolo. Se recoge la muestra L 60 (5 cc). A continuación, se reinfunde el líquido y se cierra el sistema. Es preciso cronometrar el tiempo de este ciclo drenaje-infusión, ya que se ha de descontar del tiempo total de la prueba.
8. A los 120 minutos minutos (después de descontar el tiempo de drenaje-infusión a los 60') se vuelven a drenar ~200 cc, se toma la muestra L 120 (5 cc) y se reinfunde, cerrando el sistema.
9. Se desconecta al paciente hasta los pasos finales de la prueba.
10. A los 240 minutos (después de descontar el tiempo de drenaje-infusión a los 60') se prepara bolsa de dializado de volumen y concentración que llevará el paciente a su domicilio. Se procede a drenaje COMPLETO de la bolsa de la PEP. Se pesa la bolsa

drenada y se anota en el volante y en la hoja de recogida de datos PEP. Se recoge la muestra L 240 (5cc). En pacientes diabéticos se realiza nuevo BM test.

11. Se pesa la bolsa del líquido que va a llevar el paciente a su domicilio y se apunta en la hoja de recogida de datos del PEP
12. Justo al finalizar la infusión de este líquido se permite el drenaje de 200 cc y se recoge la muestra L residual post (5 cc)

### **Comentarios adicionales**

- Se puede infundir medicación intravenosa (por ej. hierro) a lo largo de la PEP
- La necesidad de infundir fluidos i.v. (por ejemplo , si un paciente sufre una hipotensión) no altera la validez de la PEP
- Ante la presencia de abundante fibrina en la bolsa de drenaje basal o, en general cualquier circunstancia que acarree alto riesgo de mal drenaje, se considerará la suspensión de la prueba
- Se mide la presión intraperitoneal inmediatamente antes del drenaje a los 60 con el paciente en decubito supino y reposo de 5 minutos.
